# Do histological variants in urothelial carcinoma of the bladder portend poor prognosis? A systematic review and meta-analysis

Qingke Chen<sup>1,\*</sup>, Lei Li<sup>2,\*</sup>, Gongxian Wang<sup>1</sup>, Jieping Hu<sup>1</sup>, Ting Sun<sup>1</sup> and Bin Fu<sup>1</sup>

<sup>1</sup>Department of Urology, The First Affiliated Hospital of Nanchang University, Nanchang, Jiangxi 330006, China

<sup>2</sup>Department of Anesthesiology, The First Affiliated Hospital of Nanchang University, Nanchang, Jiangxi 330006, China

\*These authors contributed equally to this work

**Correspondence to:** Bin Fu, **email:** 792586870@qq.com  
Ting Sun, **email:** sunting2016@yeah.net  
Jieping Hu, **email:** hu\_jieping@163.com

**Keywords:** *histological variants, squamous differentiation, urothelial carcinoma of the bladder, prognosis*

**Received:** November 16, 2016

**Accepted:** April 18, 2017

**Published:** May 03, 2017

Copyright: Chen et al. This is an open-access article distributed under the terms of the Creative Commons Attribution License 3.0 (CC BY 3.0), which permits unrestricted use, distribution, and reproduction in any medium, provided the original author and source are credited.

## ABSTRACT

**The clinical implications of histological variants in urothelial carcinoma of the bladder has been a subject of significant controversy with many unanswered questions that remain. To clarify whether histological variants presage poor prognosis for patients suffering from urothelial carcinoma of the bladder, we scoured through various electronic databases such as Medline, Web of Knowledge, and the Cochrane Library up to August 18, 2016. Experts were consulted, and references from relevant articles were scanned. We identified thirteen eligible studies which met the inclusion criteria, including 9,533 participants. The existing evidence indicates that histological variants in urothelial carcinoma of the bladder patients do not alter their prognosis.**

## INTRODUCTION

Bladder cancer has become a common cancer globally. An estimated 430,000 new cases were diagnosed and 165,000 deaths were recorded worldwide in 2012 [1]. Bladder cancer is clinically heterogeneous and characterized by non-muscle-invasive lesions that frequently recur, but are not associated with mortality. This is also in addition to aggressive muscle-invasive lesions associated with poor outcomes [2]. Endoscopic resection, chemotherapy or immunotherapy, photochemical internalization, and radical cystectomy are therapeutic strategies used to battle the disease [3–6].

Optimal treatment decisions must incorporate both clinical and pathological findings. Urothelial carcinoma has long been known to possess a remarkable propensity for divergent differentiation. Common morphologic manifestations of divergent differentiation appear along the squamous, glandular, small cell, and even trophoblastic lines. The incidence of divergent differentiation in cystectomy specimens is as high as 33%. Its presence is associated with established predictors of aggressive behavior [7]. Studies have suggested that the presence of histological variants (HVs) are associated with cancer-specific mortality in patients with urothelial carcinoma of the bladder when treated

with radical cystectomy or intravesical immunotherapy [8, 9], however, some do not support this conclusion [10–12].

The small population of cases with histological variants in studies weakens the strength of evidence, it is possible that different types of differentiation have distinct outcomes. Furthermore, using cancer specific survival (CSS) or overall survival (OS) to evaluate the outcomes of histology variants produces different results. Therefore, we conducted a pooled analysis of currently available studies. In addition, subgroup analyses were carried out according to type of differentiation, outcome and treatment.

## RESULTS

### Study selection and characteristics

A total of 589 potentially relevant papers were identified based on the search strategy. After removing duplicate records, 344 articles were screened by title and abstract, then 19 articles were retrieved in full-text for formal review. Thirteen studies with 1,823 cases and 7,710 controls were finally included in this meta-analysis [8–21]. The flow diagram of the literature retrieval and selection are shown in Figure 1. The characteristics of the studies included are listed in Table 1. A majority of

patients in the studies underwent radical cystectomy, this is with the exception of one study where they received immunotherapy with BCG [9], and another study where they received mixed therapy including radiotherapy, chemotherapy or surgery [14]. Squamous differentiation (SD) was identified as the most common variant, however, many studies compared mixed histological variants (i.e. did not distinguish squamous, glandular, micropapillary, plasmacytoid, and sarcomatoid differentiation, apart from one study [17]) which looked at pure urothelial cancer of the bladder.

### Risk of bias and grades of evidence

The details for assessing risk of bias are shown in Figure 2. Thirteen trials were all open-label. Random sequence generation and allocation concealment were adequately performed in most of the trials. However, the data from five trials were extracted by Kaplan–Meier curve and read with Engauge Digitizer. It should be noted that

the outcomes of the original trials may have a high risk of bias. The overall methodological quality of the included trials was generally good and fair. GRADE Working Group grades of evidence were high for OS and CSS.

### Data extractions and analysis

#### Overall analysis

Thirteen trials were analyzed, with a total of 9,533 participants who met inclusion criteria. HVs were observed in 1,823 of the 9,533 patients. Random effects model was applied as there was significant heterogeneity among these trials ( $I^2 = 52.6\%$ ;  $P = 0.000$ ). The pooled results showed that HV was not correlated with poor overall survival or cancer specific survival (HR = 1.07; 95% CI = 0.94, 1.20;  $P = 0.306$ ; Figure 3).

#### Subgroup analysis

Subgroup analysis was conducted according to the HV type, treatment, and endpoint (OS or CSS). Five

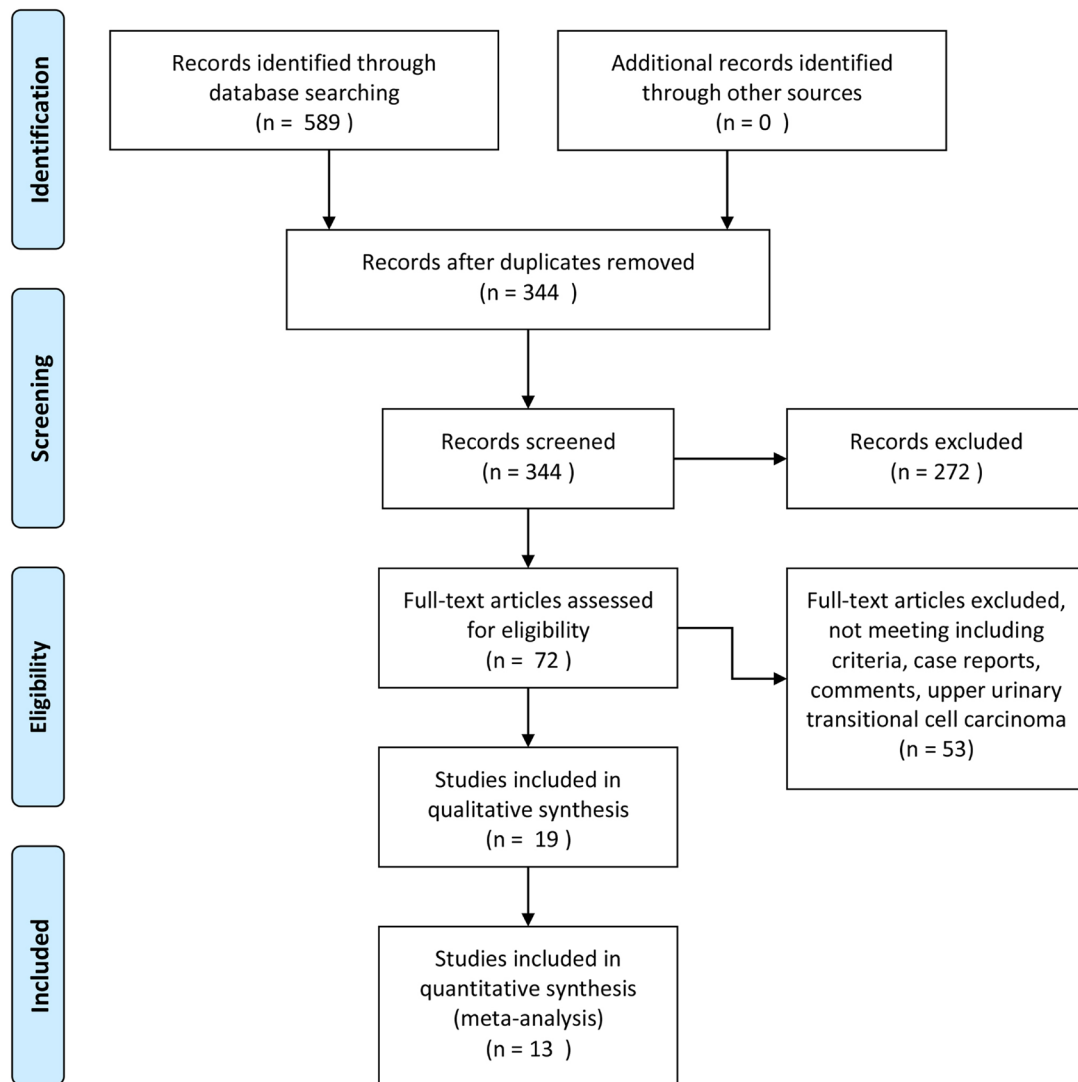

Figure 1: Flow diagram of search strategy to identify trials.

**Table 1: Characteristics of the identified studies that met the predefined inclusion criteria**

| Study               | Year | HV (cases) | PUCB (cases) | HR   | LCI  | UCI  | Outcome | Treatment | HV (type) |
|---------------------|------|------------|--------------|------|------|------|---------|-----------|-----------|
| Zargar-Shoshtari, K | 2016 | 20         | 106          | 0.87 | 0.39 | 1.94 | OS      | RC        | Mixed     |
| Gofrit, O. N        | 2016 | 41         | 140          | 3.27 | 1.14 | 9.41 | OS      | BCG       | Mixed     |
| Soave, A            | 2015 | 96         | 389          | 1.46 | 1.07 | 1.99 | CSS     | RC        | Mixed     |
| Monn, M. F          | 2015 | 68         | 462          | 0.77 | 0.48 | 1.25 | OS      | RC        | SD        |
| Monn, M. F          | 2015 | 28         | 462          | 2.2  | 1.28 | 3.78 | OS      | RC        | MPV       |
| Monn, M. F          | 2015 | 25         | 462          | 2.42 | 1.33 | 4.42 | OS      | RC        | PCV       |
| Monn, M. F          | 2015 | 15         | 462          | 1.07 | 0.43 | 2.69 | OS      | RC        | SAV       |
| Monn, M. F          | 2015 | 26         | 462          | 0.92 | 0.44 | 1.91 | OS      | RC        | Other     |
| Izard, J. P         | 2015 | 325        | 2884         | 1.26 | 0.91 | 1.74 | OS      | RC        | SD        |
| Hsieh, M. C         | 2015 | 53         | 153          | 1.67 | 1.16 | 2.4  | OS      | Mixed     | Mixed     |
| Mitra, A. P         | 2014 | 141        | 141          | 0.92 | 0.77 | 1.09 | OS      | RC        | SD        |
| Mitra, A. P         | 2014 | 97         | 97           | 0.87 | 0.72 | 1.05 | OS      | RC        | GD        |
| Lee, Y. J           | 2014 | 51         | 645          | 1.52 | 1    | 2.32 | OS      | RC        | Mixed     |
| Xylinas, E          | 2013 | 261        | 1495         | 1.17 | 1.02 | 1.33 | CSS     | RC        | Other     |
| Xylinas, E          | 2013 | 227        | 1495         | 0.98 | 0.84 | 1.13 | CSS     | RC        | SD        |
| Kim, S. P           | 2012 | 186        | 827          | 0.79 | 0.6  | 1.05 | CSS     | RC        | Mixed     |
| Shapur, N. K        | 2011 | 79         | 144          | 2.37 | 1.18 | 4.78 | OS      | Mixed     | Mixed     |
| Antunes, A. A       | 2007 | 25         | 88           | 3.51 | 1.53 | 8.08 | CSS     | RC        | SD        |
| Scosyrev, E         | 2011 | 59         | 236          | 1.1  | 0.79 | 1.33 | OS      | RC        | Mixed     |

studies with 786 SD cases (5,070 control cases) and 452 other HV cases (3440 control cases) were also analyzed. The meta-analysis indicated that the pooled HR was 0.97 (95% CI = 0.83, 1.11,  $P = 0.701$ ; Figure 4) for SD which held no statistical significance. For other HVs, similar results were obtained (HR = 1.11, 95% CI = 0.83, 1.39,  $P = 0.481$ ; Figure 4).

After the trials were stratified by treatment, ten studies with 1,670 HV cases and 10,621 PUCB cases treated by radical cystectomy (RC) underwent pooled analysis; the results suggested no significant difference between the two groups (HR = 1.03, 95% CI = 0.92, 1.15,  $P = 0.530$ ; Supplementary Figure 1). Subgroup analysis for the two distinct endpoints were also stratified, nine studies with 1,028 HV cases and 6,856 PUCB cases were incorporated into an OS subgroup, while four studies with 795 HV cases and 4294 PUCB cases were incorporated into a CSS subgroup. The pooled results showed that there was no significant difference between the HV and PUCB cases regardless of OS (HR = 1.09, 95% CI = 0.92, 1.26,  $P = 0.319$ ; Supplementary Figure 2) or CSS (HR = 1.06, 95% CI = 0.85, 1.28,  $P = 0.605$ ; Supplementary Figure 2).

#### Sensitivity analysis and publication bias

One-way sensitivity analyses were performed to assess the stability of the pooled results. In the sensitivity analysis, each single study included in the meta-analysis was deleted each time to observe the influence of the data

on the pooled ORs. No single study affected the pooled OR value, suggesting that the results of this meta-analysis were stable (Figure 5). Begger's funnel plot and Egger's test was performed to assess the publication bias [22]. The relatively symmetrical shape of the funnel plots provided evidence of a low level of publication bias (Supplementary Figure 3). Statistical analysis showed there was no significant publication bias for the Begger's test (Begger's test,  $P = 0.059$ ; Egger's test,  $P = 0.022$ ).

## DISCUSSION

In this systematic review and meta-analysis, we included thirteen trials with a total of 9,533 participants who suffered from UCB. Of these patients, 1,823 cases were pathologically confirmed UCB with HVs. GRADE Working Group grades of evidence ensure the high quality results of our analysis. The assessments of sensitivity and publication bias indicated that our analyses were reliable. Our results suggested that HV did not predict a poor prognosis. HVs should therefore be considered a negligible factor in a predictive model of survival.

Subgroup analysis indicated that squamous/ non-squamous differentiation did not influence survival. Antunes concluded that squamous differentiation was an independent prognostic factor for CSS in patients with bladder cancer treated by RC [13]. The small population

of squamous differentiation (25 cases) rendered low weight (0.17%). Other studies have reported that squamous differentiation was associated with similar survival rates to PUCB [11, 12, 17, 20]. However, it should be noted that the presence of non-squamous differentiations such as micropapillary variant (MPV), plasmacytoid (PCV), and sarcomatoid (SAV) differentiation occurred in small populations of UCB patients, with studies suggesting that MPV and PCV act as the aggressive variants which are frequently associated with poor outcomes [23–25]. Therefore, the impact of these HVs on UCB patients' survival should be evaluated with caution.

Radical cystectomy was the prevalent method of treatment for UCB patients with HVs. HVs did not influence the effects of RC; however, in patients who underwent mixed therapy [14, 18], HVs predicted poor prognosis (Supplementary Figure 1). In these studies, patients first underwent immunotherapy or chemotherapy and RC was offered to patients with disease progression, or to patients resistant to immunotherapy or chemotherapy.

We expected patients with HVs to receive RC as early as possible to achieve a better outcome. Regarding OS or CSS, patients with HVs did not have different the outcomes, indicating current treatment strategies for patients with HVs are acceptable.

There are several limitations worth noting. Firstly, some studies have reached their conclusions from a small population [9, 10], so the quality of available research was perhaps compromised. Further studies consisting of a larger amount of patients are necessary to confirm these results. Secondly, the significance of HVs in various tumor stages were not evaluated. Available data was unable to analyse the meaning of various HVs in the same stage. Thirdly, the extent of variant histology was not assessed in most of the studied literature and the survival of mixed HV patients, (indicates the UCB accompanied by two or more variants), was not evaluated. Fourthly, radical cystectomy was the main treatment in most of the studies included, so the clinical significance of HVs in chemotherapy or immunotherapy require further exploration. Moreover,

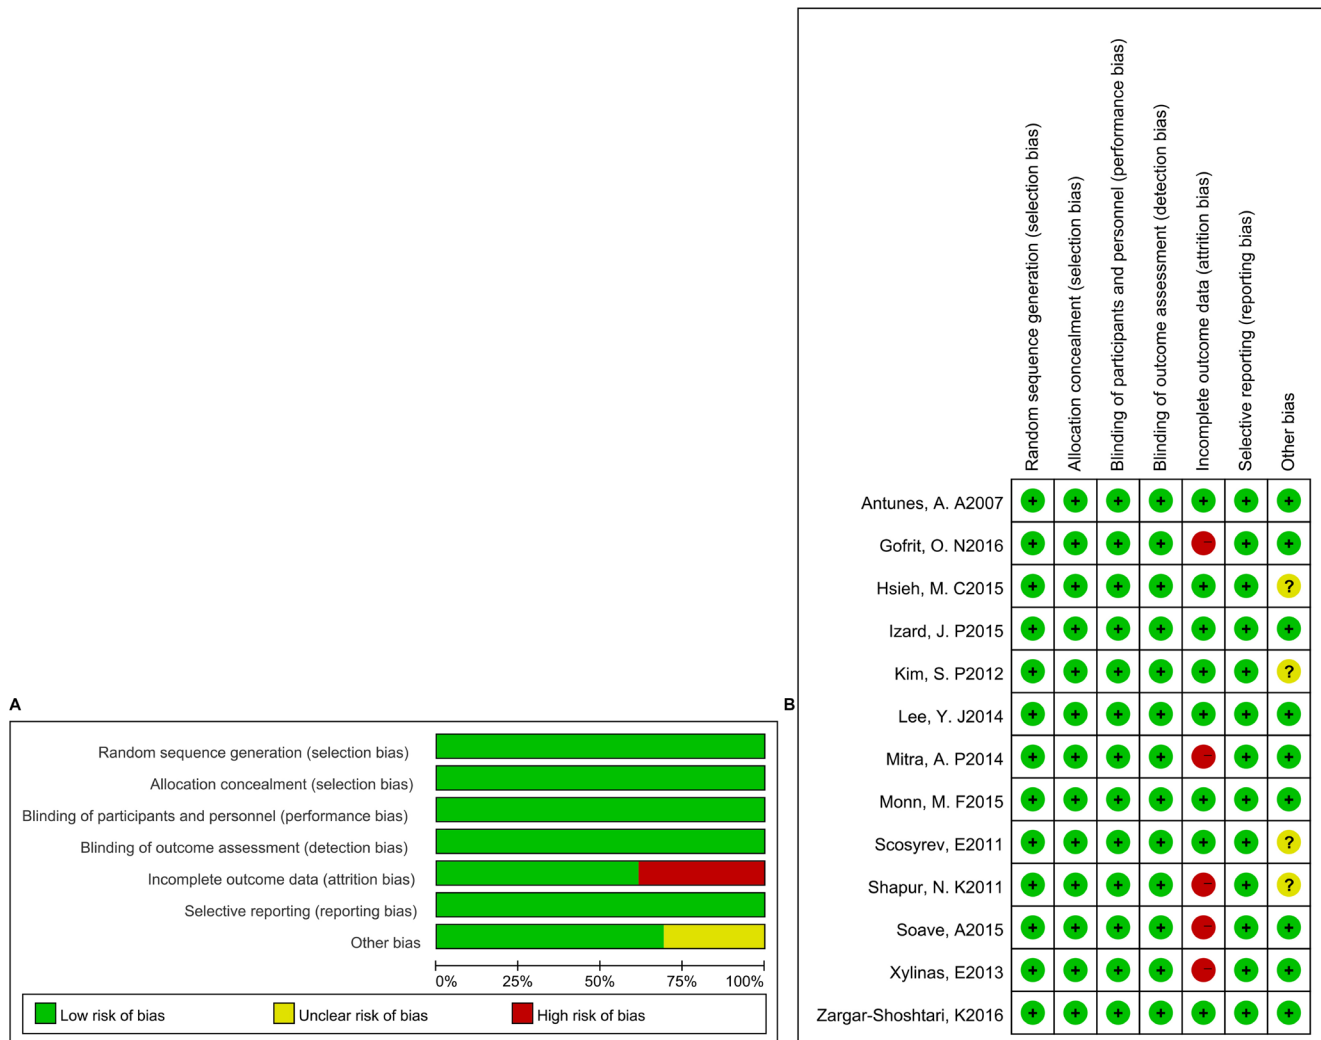

**Figure 2:** Risk of bias graph (A) and risk of bias summary (B).

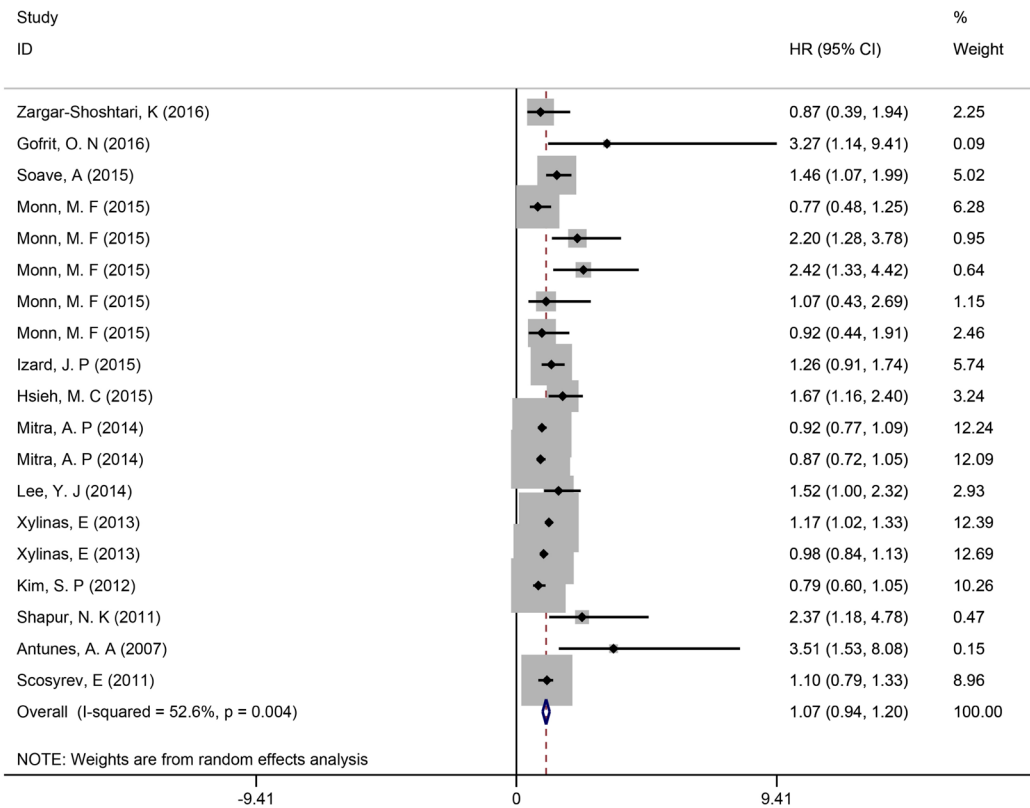

Figure 3: Overall analysis of HVs in UCB.

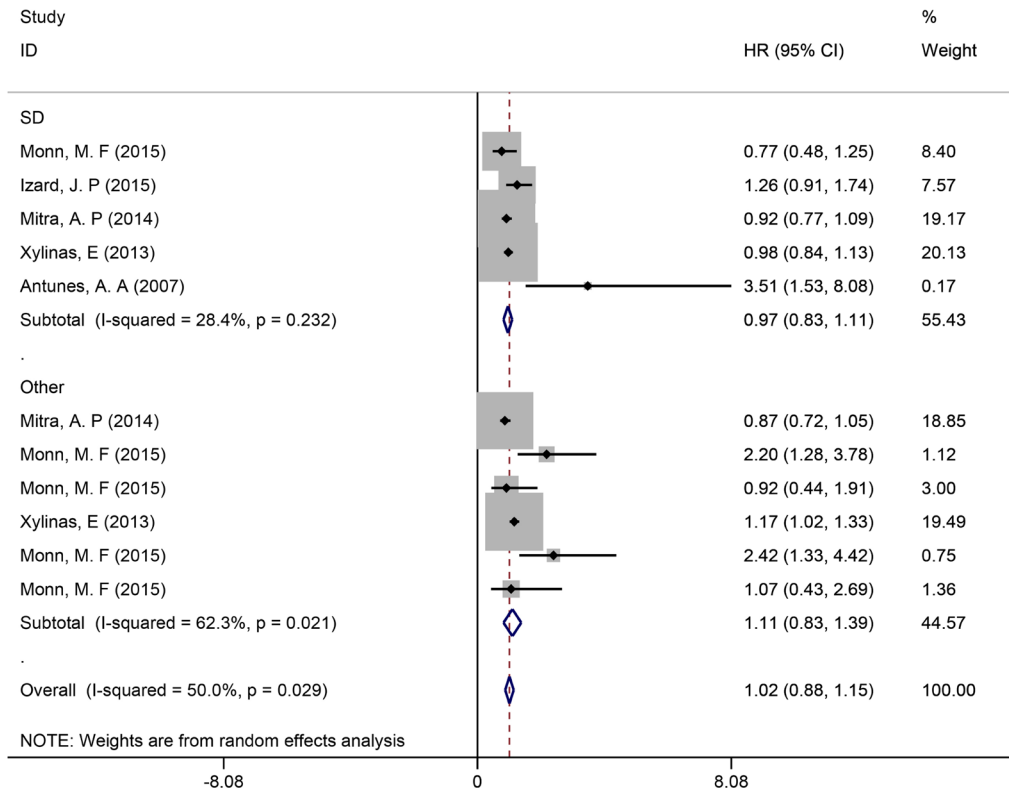

Figure 4: Subgroup analysis of survival in UCB patients with different HVs.

some variants have significant treatment implications—small cell needs neoadjuvant chemotherapy [26], micro papillary is fairly BCG resistant [9], etc. Overall, the majority of studies demonstrate that variant histology is more aggressive but combination treatments play a role in the final outcome. Furthermore, some cases have mixed variants versus pure.

## MATERIALS AND METHODS

### Systematic search strategy

We conducted a systematic search of electronic databases, including Medline, Web of Knowledge, and the Cochrane Library (updated August 18, 2016), to identify all relevant studies. The search combined key words: (“Bladder cancer” OR “Urothelial carcinoma of the bladder”) AND (“Histological variants” OR “Squamous differentiation” OR “Glandular differentiation”). See Appendix. Experts were consulted, and references from relevant articles were scanned. Studies were considered regardless of language status. Two independent authors (Qingke Chen and Jieping Hu) performed all aspects of the search strategy, screening the titles and abstracts of all articles following the inclusion criteria and then reviewing the full-text articles in detail.

### Identification of articles and data extractions

Trials performed with radical cystectomy, intravesical therapy or immunotherapy to compare

histological variants (HV) and pure urothelial carcinoma of the bladder (PUCB) were eligible for inclusion. Two investigators independently extracted the data, and an agreement was reached through discussion. Eligible cases met the following criteria: (1) the diagnosis of urothelial carcinoma of the bladder had to be confirmed pathologically; (2) all patients should be confirmed as PUCB or UCB with HV; (3) patients underwent schedule immunotherapy, intravesical chemotherapy or radical cystectomy; (4) outcomes: overall survival (OS), objective response rate (ORR), progress-free survival (PFS) or cancer specific survival (CSS) were evaluated; and (5) study design was randomized controlled trial (RCT). The exclusion criteria for our analysis were as follows: (1) duplicated data (these were removed and only the updated data were selected); (2) patients with a history of previous urothelial carcinoma and concomitant upper tract urothelial carcinoma; (3) patients who underwent irregular intravesical chemotherapy or loss of follow up. The formula recommended by Spotswood et al. [27] was adopted to calculate the corresponding HR of the missing data (Supplementary Table 1). The Kaplan–Meier curve was read using Engauge Digitizer version 4.1 (available at: <http://sourceforge.net/>) unless the adequate data could be extracted [28].

### Assessing risk of bias and grading the quality of evidence

Assessment for the risk of bias was performed in accordance with the guidelines outlined in the Cochrane

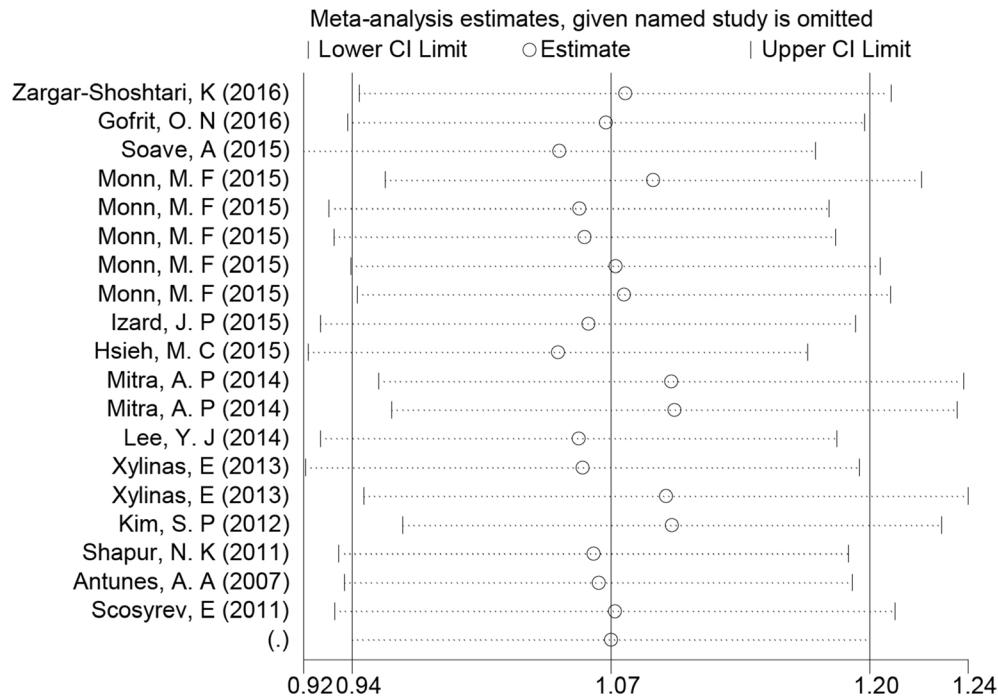

Figure 5: Sensitivity analysis of the summary HR of survival.

handbook for systematic reviews of interventions [29]. Two investigators (Qingke Chen and Jieping Hu) objectively reviewed all studies and assigned a value of “high”, “low” or “unclear” to the following domains: random sequence generation; allocation concealment; blinding of participants and personnel; blinding of outcome assessment; incomplete outcome data; selective reporting; and other biases. Trials with high risk of bias for any one or more key domains were considered to be “high risk”. Trial with low risk of bias for all key domains was considered to be “low risk”. Otherwise, they were considered as “unclear”[30].

The GRADE system identified four grades for rating the quality of evidence: high, moderate, low, and very low. The grade indicated the extent of further research required to change our attitudes concerning the estimate of the effect. GRADE profiler software (version 3.6) was utilized to rate the level of evidence.

### Data synthesis and data analysis

We estimated the HR or relative risk (RR) with 95% confidence interval (CI) for dichotomous outcomes, and the weighted mean difference (WMD) with 95% CI for continuous outcomes. Statistical heterogeneity among studies was evaluated utilizing  $I^2$  statistics (ranges from 0 to 100%),  $\lambda^2$  test, and  $P$  values[31]. The fixed effects model method (Mantel-Haenszel) was used, except in the case where a significant  $Q$  test ( $P < 0.05$ ) or  $I^2 > 50\%$  indicated the existence of heterogeneity among studies. When the existence of heterogeneity was indicated, the random effects model (DerSimonian-Laird method) was instead applied [32]. The presence of publication bias was also evaluated using Begg and Egger tests. Sensitivity analysis was performed to assess the stability of the results. Funnel plots were drawn to estimate any potential publication bias, where the standard error of log (HR) of each study was plotted against its log (HR). Whether the funnel plot was symmetrical was assessed with the Egger’s test [33, 34]. When using Egger’s test to assess the publication bias,  $P < 0.05$  was considered statistically significant. All statistical tests for this meta-analysis were performed with STATA 12.0.

### Appendix

("urinary bladder neoplasms"[MeSH Terms] OR ("urinary"[All Fields] AND "bladder"[All Fields] AND "neoplasms"[All Fields]) OR "urinary bladder neoplasms"[All Fields] OR ("bladder"[All Fields] AND "cancer"[All Fields]) OR "bladder cancer"[All Fields]) OR ("carcinoma, transitional cell"[MeSH Terms] OR ("carcinoma"[All Fields] AND "transitional"[All Fields] AND "cell"[All Fields]) OR "transitional cell carcinoma"[All Fields] OR ("urothelial"[All Fields] AND

"carcinoma"[All Fields]) OR "urothelial carcinoma"[All Fields]) AND ("urinary bladder"[MeSH Terms] OR ("urinary"[All Fields] AND "bladder"[All Fields]) OR "urinary bladder"[All Fields] OR "bladder"[All Fields])) AND ((histological[All Fields] AND variants[All Fields]) OR (squamous[All Fields] AND ("cell differentiation"[MeSH Terms] OR ("cell"[All Fields] AND "differentiation"[All Fields]) OR "cell differentiation"[All Fields] OR "differentiation"[All Fields])) OR (glandular[All Fields] AND ("cell differentiation"[MeSH Terms] OR ("cell"[All Fields] AND "differentiation"[All Fields]) OR "cell differentiation"[All Fields] OR "differentiation"[All Fields]))).

### CONCLUSIONS

In summary, our study evaluated the roles of HVs in UCB patients. Our meta-analysis indicated that HVs did not predict poor prognosis for UCB patients who underwent RC. However, data showed that HVs were significantly associated with inferior survival for patients undergoing mixed therapy. Patients with HVs who receive RC as early as possible may achieve a better outcome.

### Authors’ contributions

Jieping Hu had full access to all the data in the study and takes responsibility for the integrity of the data and the accuracy of the data analysis. Study concept and design: Fu, Sun. Acquisition of data: Li, Chen, Sun, Fu. Analysis and interpretation of data: Li, Chen, and Sun. Drafting of the manuscript: Hu, Chen, and Wang. Critical revision of the manuscript for important intellectual content: Hu, Chen, Wang, Fu. Statistical analysis: Hu, Chen. Obtaining funding: None. Administrative, technical, or material support: None. Supervision: Fu, Sun. Other (specify): None.

### CONFLICTS OF INTEREST

Jieping Hu certifies that all conflicts of interest, including specific financial interests and relationships and affiliations relevant to the subject matter or materials discussed in the manuscript (eg, employment/affiliation, grants or funding, consultancies, honoraria, stock ownership or options, expert testimony, royalties, or patents filed, received, or pending), are the following: None.

### FUNDING

This study was supported by the National Natural Science Foundation of China (grant no. 81160272) and the Natural Science Foundation of Jiangxi (grant no. 800GZY0039).

## REFERENCES

1. Antoni S, Ferlay J, Soerjomataram I, Znaor A, Jemal A, Bray F. Bladder Cancer Incidence and Mortality: A Global Overview and Recent Trends. *Eur Urol.* 2016; 71:96–108. doi: 10.1016/j.eururo.2016.06.010.
2. Prasad SM, Decastro GJ, Steinberg GD, Medscape. Urothelial carcinoma of the bladder: definition, treatment and future efforts. *Nat Rev Urol.* 2011; 8: 631–42. doi: 10.1038/nrurol.2011.144.
3. Donin NM, Lenis AT, Holden S, Drakaki A, Pantuck A, Belldegrun A, Chamie K. Immunotherapy in the Treatment of Urothelial Carcinoma. *J Urol.* 2016; 197:14–22. doi: 10.1016/j.juro.2016.02.3005.
4. Chou R, Selph SS, Buckley DI, Gustafson KS, Griffin JC, Grusing SE, Gore JL. Treatment of muscle-invasive bladder cancer: A systematic review. *Cancer.* 2016; 122: 842–51. doi: 10.1002/cncr.29843.
5. Arentsen HC, Falke J, Hogset A, Oosterwijk E, Alfred Witjes J. The effect of photochemical internalization of bleomycin in the treatment of urothelial carcinoma of the bladder: an *in vitro* study. *Urol Oncol.* 2014; 32: 49 e1–6. doi: 10.1016/j.urolonc.2013.07.005.
6. Babjuk M, Burger M, Zigeuner R, Shariat SF, van Rhijn BW, Comperat E, Sylvester RJ, Kaasinen E, Bohle A, Palou Redorta J, Roupert M, European Association of U. EAU guidelines on non-muscle-invasive urothelial carcinoma of the bladder: update 2013. *Eur Urol.* 2013; 64:639–53. doi: 10.1016/j.eururo.2013.06.003.
7. Humphrey PA, Moch H, Cubilla AL, Ulbright TM, Reuter VE. The 2016 WHO Classification of Tumours of the Urinary System and Male Genital Organs-Part B: Prostate and Bladder Tumours. *Eur Urol.* 2016; 70:106–19. doi: 10.1016/j.eururo.2016.02.028.
8. Soave A, Schmidt S, Dahlem R, Minner S, Engel O, Kluth LA, John LM, Hansen J, Schmid M, Sauter G, Shariat SF, Fisch M, Rink M. Does the extent of variant histology affect oncological outcomes in patients with urothelial carcinoma of the bladder treated with radical cystectomy? *Urol Oncol.* 2015; 33:21.e1–9. doi: 10.1016/j.urolonc.2014.10.013.
9. Gofrit ON, Yutkin V, Shapiro A, Pizov G, Zorn KC, Hidas G, Gielchinsky I, Duvdevani M, Landau EH, Pode D. The Response of Variant Histology Bladder Cancer to Intravesical Immunotherapy Compared to Conventional Cancer. *Front Oncol.* 2016; 6:43. doi: 10.3389/fonc.2016.00043.
10. Zargar-Shoshtari K, Sverrisson EF, Sharma P, Gupta S, Poch MA, Pow-Sang JM, Spiess PE, Sexton WJ. Clinical Outcomes After Neoadjuvant Chemotherapy and Radical Cystectomy in the Presence of Urothelial Carcinoma of the Bladder With Squamous or Glandular Differentiation. *Clin Genitourin Cancer.* 2016; 14:82–8. doi: 10.1016/j.clgc.2015.08.006.
11. Iazard JP, Siemens DR, Mackillop WJ, Wei X, Leveridge MJ, Berman DM, Peng Y, Booth CM. Outcomes of squamous histology in bladder cancer: a population-based study. *Urol Oncol.* 2015; 33:425.e7–13. doi: 10.1016/j.urolonc.2015.06.011.
12. Mitra AP, Bartsch CC, Bartsch G Jr, Miranda G, Skinner EC, Daneshmand S. Does presence of squamous and glandular differentiation in urothelial carcinoma of the bladder at cystectomy portend poor prognosis? An intensive case-control analysis. *Urol Oncol.* 2014; 32:117–27. doi: 10.1016/j.urolonc.2012.08.017.
13. Antunes AA, Nesrallah LJ, Dall’Oglio MF, Maluf CE, Camara C, Leite KR, Srougi M. The role of squamous differentiation in patients with transitional cell carcinoma of the bladder treated with radical cystectomy. *Int Braz J Urol.* 2007; 33:339–45; discussion 46.
14. Hsieh MC, Sung MT, Chiang PH, Huang CH, Tang Y, Su YL. The Prognostic Impact of Histopathological Variants in Patients with Advanced Urothelial Carcinoma. *PLoS One.* 2015; 10:e0129268. doi: 10.1371/journal.pone.0129268.
15. Kim SP, Frank I, Cheville JC, Thompson RH, Weight CJ, Thapa P, Boorjian SA. The impact of squamous and glandular differentiation on survival after radical cystectomy for urothelial carcinoma. *J Urol.* 2012; 188:405–9. doi: 10.1016/j.juro.2012.04.020.
16. Lee YJ, Moon KC, Jeong CW, Kwak C, Kim HH, Ku JH. Impact of squamous and glandular differentiation on oncologic outcomes in upper and lower tract urothelial carcinoma. *PLoS One.* 2014; 9:e107027. doi: 10.1371/journal.pone.0107027.
17. Monn MF, Kaimakliotis HZ, Pedrosa JA, Cary KC, Bihle R, Cheng L, Koch MO. Contemporary bladder cancer: variant histology may be a significant driver of disease. *Urol Oncol.* 2015; 33:18.e5–20. doi: 10.1016/j.urolonc.2014.10.001.
18. Shapur NK, Katz R, Pode D, Shapiro A, Yutkin V, Pizov G, Appelbaum L, Zorn KC, Duvdevani M, Landau EH, Gofrit ON. Is radical cystectomy mandatory in every patient with variant histology of bladder cancer. *Rare Tumors.* 2011; 3:e22. doi: 10.4081/rt.2011.e22.
19. Wasco MJ, Daignault S, Zhang Y, Kunju LP, Kinnaman M, Braun T, Lee CT, Shah RB. Urothelial carcinoma with divergent histologic differentiation (mixed histologic features) predicts the presence of locally advanced bladder cancer when detected at transurethral resection. *Urology.* 2007; 70:69–74. doi: 10.1016/j.urology.2007.03.033.
20. Xylinas E, Rink M, Robinson BD, Lotan Y, Babjuk M, Brisuda A, Green DA, Kluth LA, Pycha A, Fradet Y, Faison T, Lee RK, Karakiewicz PI, et al. Impact of histological variants on oncological outcomes of patients with urothelial carcinoma of the bladder treated with radical cystectomy. *Eur J Cancer.* 2013; 49: 1889–97. doi: 10.1016/j.ejca.2013.02.001.
21. Scosyrev E, Ely BW, Messing EM, Speights VO, Grossman HB, Wood DP, de Vere White RW, Vogelzang NJ, Trump DL, Natale RB, Tangen CM, Crawford ED, Thompson IM. Do mixed histological features affect survival



- benefit from neoadjuvant platinum-based combination chemotherapy in patients with locally advanced bladder cancer? A secondary analysis of Southwest Oncology Group-Directed Intergroup Study (S8710). *BJU Int.* 2011; 108:693–9. doi: 10.1111/j.1464-410X.2010.09900.x.
22. Hu J, Feng F, Zhu S, Sun L, Li G, Jiang N, Shang Z, Niu Y. Catalase C-262T polymorphism and risk of prostate cancer: evidence from meta-analysis. *Gene.* 2015; 558:265–70. doi: 10.1016/j.gene.2015.01.005.
  23. Kaimakliotis HZ, Monn MF, Cheng L, Masterson TA, Cary KC, Pedrosa JA, Foster RS, Koch MO, Bihrl R. Plasmacytoid bladder cancer: variant histology with aggressive behavior and a new mode of invasion along fascial planes. *Urology.* 2014; 83:1112–6. doi: 10.1016/j.urology.2013.12.035.
  24. Kamat AM, Gee JR, Dinney CP, Grossman HB, Swanson DA, Millikan RE, Detry MA, Robinson TL, Pisters LL. The case for early cystectomy in the treatment of nonmuscle invasive micropapillary bladder carcinoma. *J Urol.* 2006; 175:881–5. doi: 10.1016/S0022-5347(05)00423-4.
  25. Keck B, Wach S, Stoehr R, Kunath F, Bertz S, Lehmann J, Stockle M, Taubert H, Wullich B, Hartmann A. Plasmacytoid variant of bladder cancer defines patients with poor prognosis if treated with cystectomy and adjuvant cisplatin-based chemotherapy. *BMC Cancer.* 2013; 13:71. doi: 10.1186/1471-2407-13-71.
  26. Porten SP, Willis D, Kamat AM. Variant histology: role in management and prognosis of nonmuscle invasive bladder cancer. *Curr Opin Urol.* 2014; 24:517–23. doi: 10.1097/mou.0000000000000089.
  27. Spruance SL, Reid JE, Grace M, Samore M. Hazard ratio in clinical trials. *Antimicrob Agents Chemother.* 2004; 48:2787–92. doi: 10.1128/AAC.48.8.2787-2792.2004.
  28. Zhou JG, Tian X, Wang X, Tian JH, Wang Y, Wang F, Zhang Y, Ma H. Treatment on advanced NSCLC: platinum-based chemotherapy plus erlotinib or platinum-based chemotherapy alone? A systematic review and meta-analysis of randomised controlled trials. *Med Oncol.* 2015; 32: 471. doi: 10.1007/s12032-014-0471-0.
  29. Cochrane Handbook for Systematic Reviews of Interventions. Online Kensaku. 2014; 35:154–5.
  30. Higgins JP, Altman DG, Gotzsche PC, Juni P, Moher D, Oxman AD, Savovic J, Schulz KF, Weeks L, Sterne JA, Cochrane Bias Methods G, Cochrane Statistical Methods G. The Cochrane Collaboration’s tool for assessing risk of bias in randomised trials. *BMJ.* 2011; 343:d5928. doi: 10.1136/bmj.d5928.
  31. Zintzaras E, Ioannidis JP. Heterogeneity testing in meta-analysis of genome searches. *Genet Epidemiol.* 2005; 28:123–37. doi: 10.1002/gepi.20048.
  32. Sacks HS, Berrier J, Reitman D, Ancona-Berk VA, Chalmers TC. Meta-analyses of randomized controlled trials. *N Engl J Med.* 1987; 316:450–5. doi: 10.1056/NEJM198702193160806.
  33. Egger M, Davey Smith G, Schneider M, Minder C. Bias in meta-analysis detected by a simple, graphical test. *BMJ.* 1997; 315:629–34.
  34. Begg CB, Mazumdar M. Operating characteristics of a rank correlation test for publication bias. *Biometrics.* 1994; 50:1088–101.
