# Supplementary material for: Do histological variants in urothelial carcinoma of the bladder portend poor prognosis? A systematic review and meta-analysis
Source: PubMed Central journal article supplement (PMC5564644; doi:10.18632/oncotarget.17593), 2017-05-03
Supplement: oncotarget-08-48263-s001.pdf [file oncotarget-08-48263-s001.pdf]

# Do histological variants in urothelial carcinoma of the bladder portend poor prognosis? A systematic review and meta-analysis

## Supplementary Materials

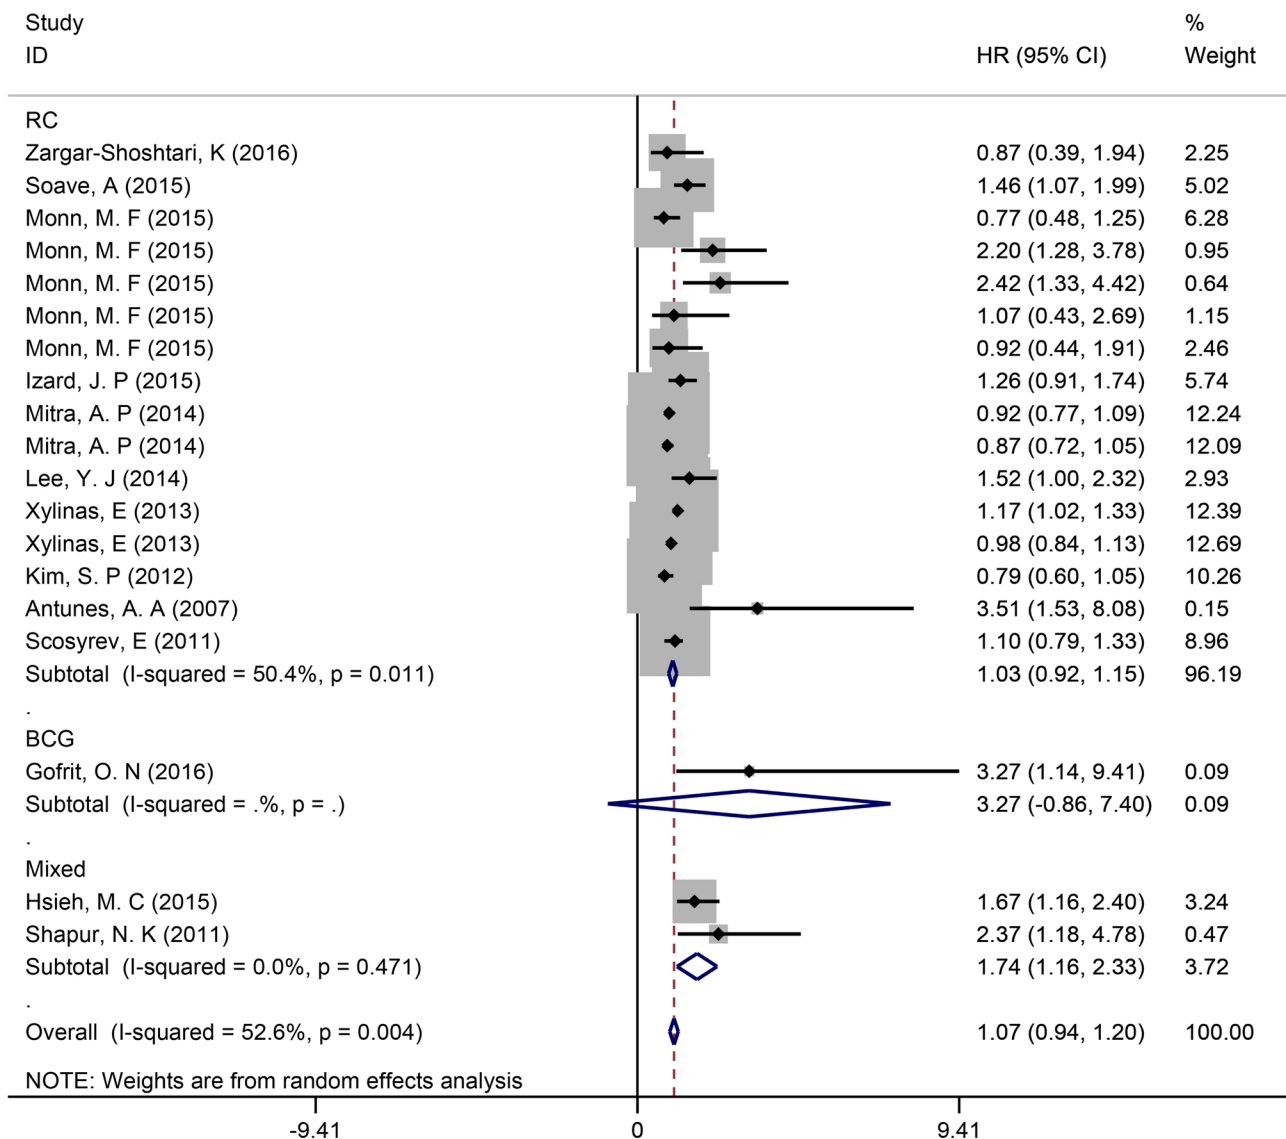

Supplementary Figure 1: Subgroup analysis of different treatments with HVs.

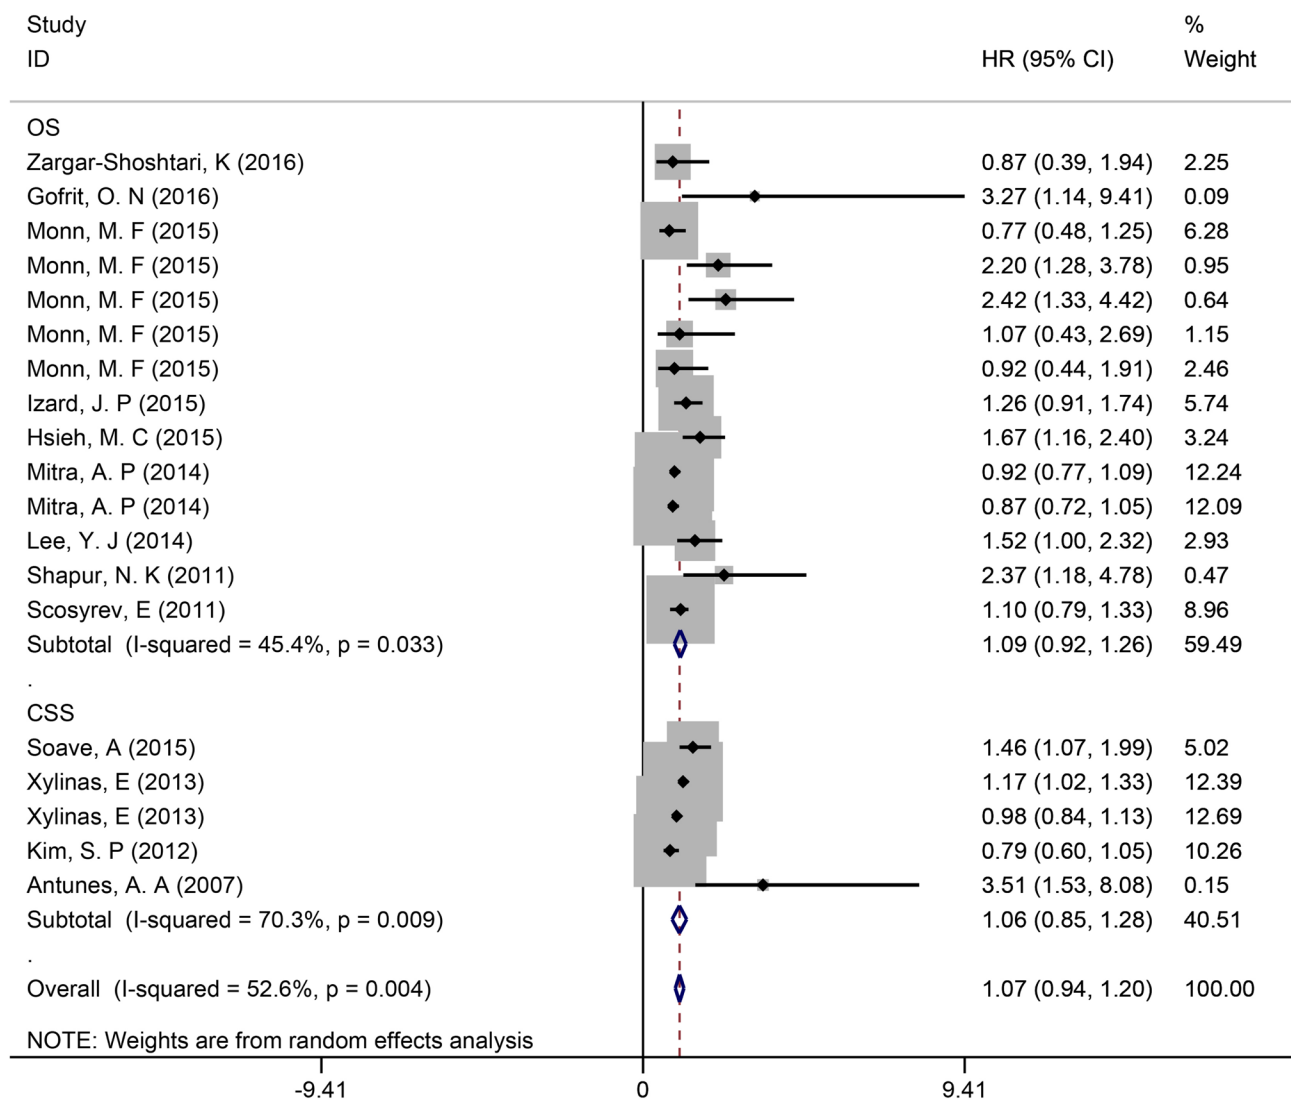

Supplementary Figure 2: Subgroup analysis of different endpoints with HVs.

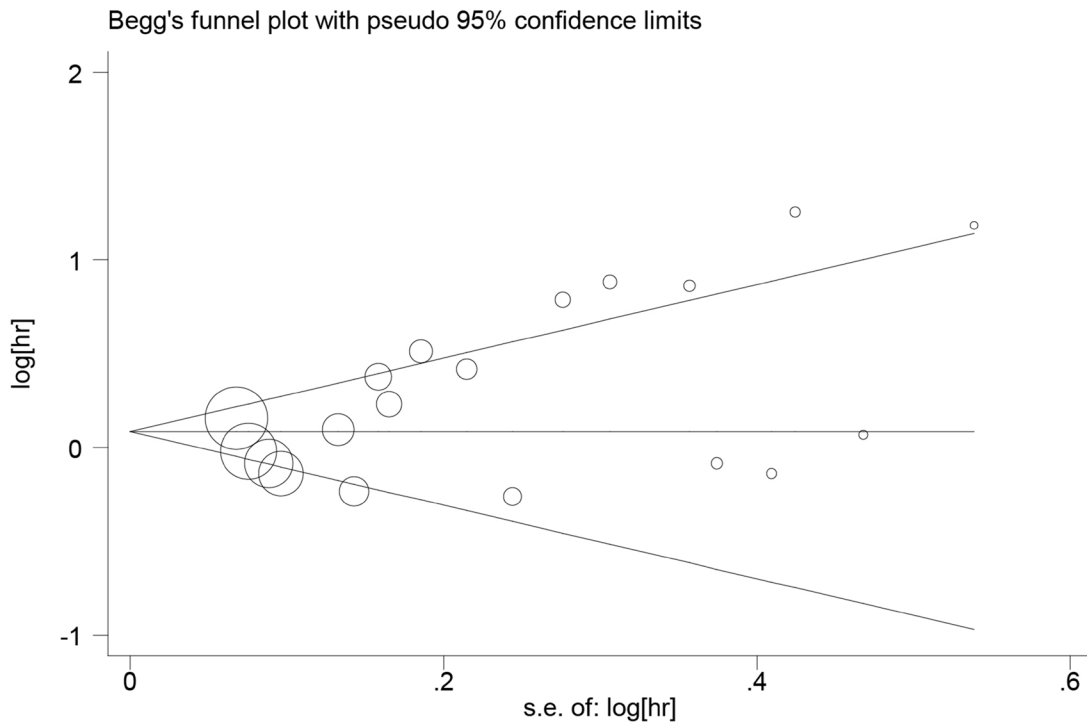

**Supplementary Figure 3: Funnel plots of overall analysis.**

**Supplementary Table 1: The formula recommended by Spotswood et al. to calculate the corresponding HR. See Supplementary\_Table\_1**
